# Supplementary material for: Advanced methods for uncertainty assessment and global sensitivity analysis of a Eulerian atmospheric chemistry transport model
Source: Copernicus journal article supplement (doi:10.5194/acp-2018-690), 2018-07-26
Supplement: Supplementary file 1 [file acp-2018-690-supplement.pdf]

## Advanced methods for uncertainty assessment and global sensitivity analysis of a Eulerian atmospheric chemistry transport model

Ksenia Aleksankina,<sup>1,2</sup> Stefan Reis<sup>2,3</sup>, Massimo Vieno<sup>2</sup>, and Mathew R. Heal<sup>1</sup>

<sup>1</sup> School of Chemistry, University of Edinburgh, Edinburgh, UK

<sup>2</sup> NERC Centre for Ecology & Hydrology, Penicuik, UK

<sup>3</sup> University of Exeter Medical School, European Centre for Environment and Health, Knowledge Spa, Truro, UK

Figure S1 shows the spatial distribution of  $k$ -fold cross-validation errors for the Gaussian process emulators used to estimate the annual average surface concentrations of  $O_3$ ,  $NO_2$ , and  $PM_{2.5}$ . The  $k$ -fold cross-validation values were calculated as described by Lataniotis et al. (2017)

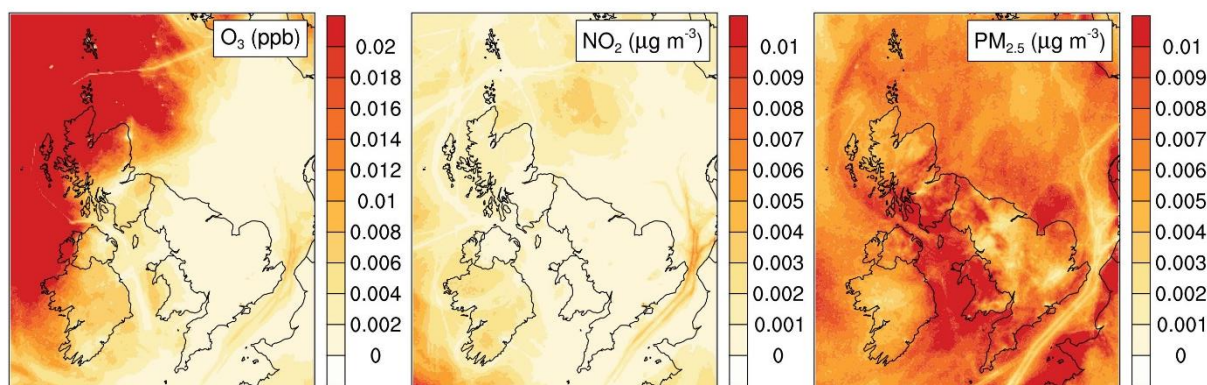

**Figure S1 Spatial distribution of  $k$ - fold cross validation error values for emulated annual average concentrations of  $O_3$ ,  $NO_2$ , and  $PM_{2.5}$ .**

Figure S2 shows the scatter plot of the first-order sensitivity indices against the total sensitivity indices. The grey lines indicate  $\pm 3\%$  fluctuation in the sensitivity index values, which were attributed to numerical errors in the calculation of sensitivity indices the analytical values of which are close to zero.

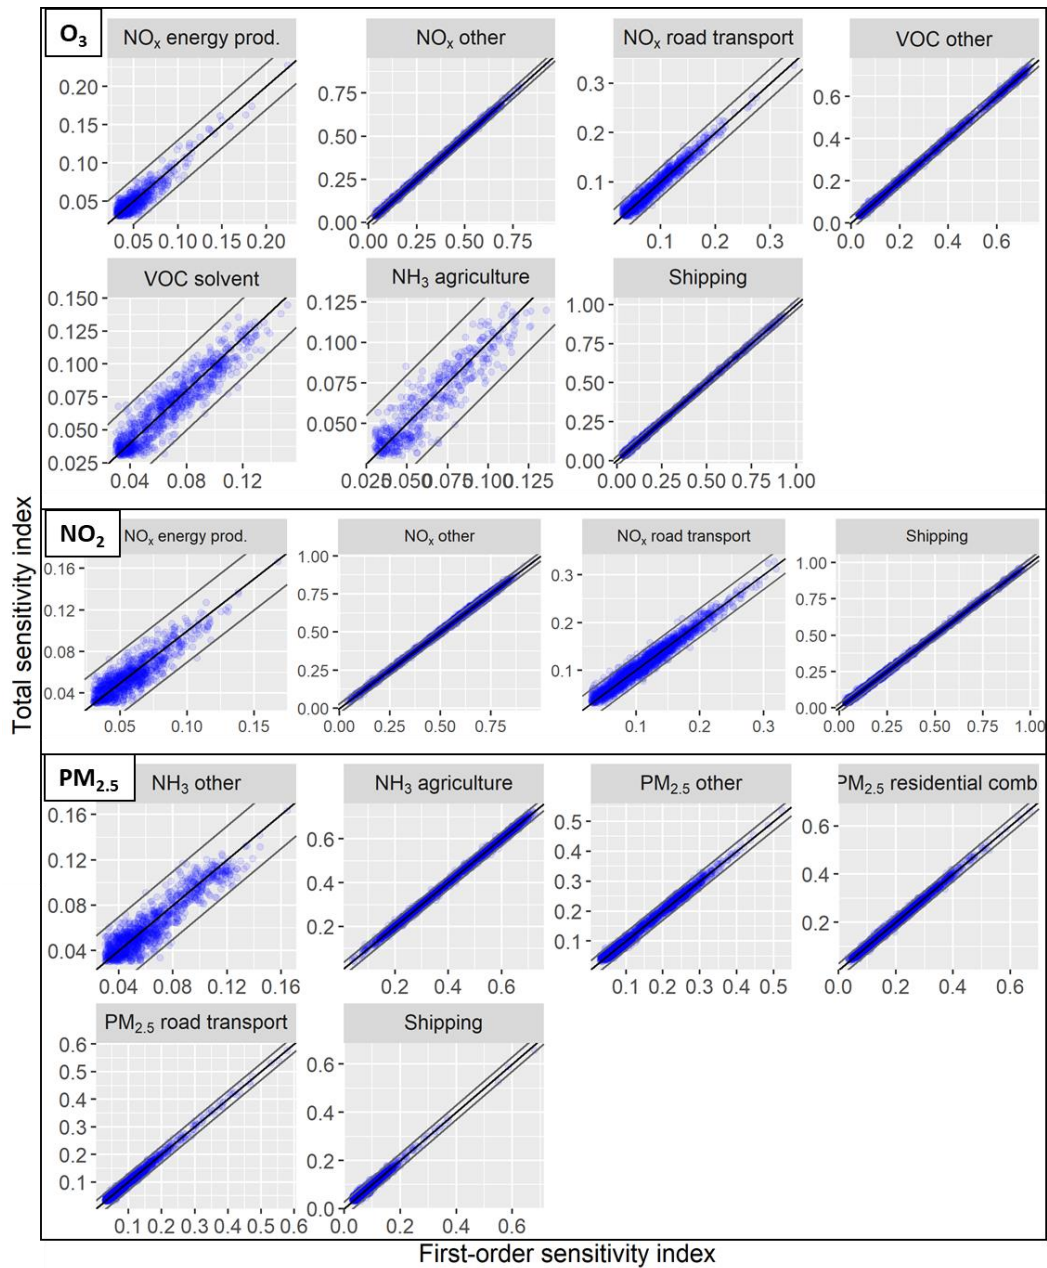

**Figure S2** Scatterplot of the first-order sensitivity indices against the total sensitivity indices for the inputs affecting the variation in modelled values of O<sub>3</sub>, NO<sub>2</sub>, and PM<sub>2.5</sub>.
